# Supplementary material for: Link between fluid/crystallized intelligence and global/local visual abilities across adulthood
Source: PubMed Central journal article supplement — Conscious Cogn. Author manuscript; Available in PMC 2023 Sep 6. (PMC10481540; doi:10.1016/j.concog.2022.103429), 2022-10-25
Supplement: NIHMS1926537-supplement-Supplementary_Material.pdf [file NIHMS1926537-supplement-Supplementary_Material.pdf]

## Supplementary Material

### 1. Variable Definition

**Supplementary Table S1**

*Description of the variables of interest, extracted from the visual search task*

| Index type       | Variable | Formula                                                                        | Definition                                                                                                                                                                                                                                                                                                                                                                          |
|------------------|----------|--------------------------------------------------------------------------------|-------------------------------------------------------------------------------------------------------------------------------------------------------------------------------------------------------------------------------------------------------------------------------------------------------------------------------------------------------------------------------------|
| Effect Size      | L0D-G0D  | $= \frac{mRT_{L0D} - mRT_{G0D}}{\sqrt{\frac{sdRT_{L0D}^2 + sdRT_{G0D}^2}{2}}}$ | Global Advantage Index (GAI)<br>Effect size (Cohen's d) between the condition Local-0Distractor and Global-0Distractor (based on the RTs for correct responses to target-present trials only, in the absence of distractors) within each participant. Higher score reflects the higher global advantage effect.                                                                     |
| Effect Size      | L5D-L0D  | $= \frac{mRT_{L5D} - mRT_{L0D}}{\sqrt{\frac{sdRT_{L5D}^2 + sdRT_{L0D}^2}{2}}}$ | Distractor-Interference Index for Local processing (DII <sub>L</sub> )<br>Effect size (Cohen's d) between the condition Local-5Distractors and Local-0Distractor (based on the correct RTs to target-present trials only) within each participant. Higher score reflects higher interference of the number of distractors on the identification of local targets.                   |
| Effect Size      | G5D-G0D  | $= \frac{mRT_{G5D} - mRT_{G0D}}{\sqrt{\frac{sdRT_{G5D}^2 + sdRT_{G0D}^2}{2}}}$ | Distractor-Interference Index for Global processing (DII <sub>G</sub> )<br>Effect size (Cohen's d) between the condition Global-5Distractors and Global-0Distractor (based on the RTs for correct responses to target-present trials only) within each participant. Higher score reflects higher interference of the number of distractors on the identification of global targets. |
| Efficiency Score | L0D      | $= \frac{ACC_{L0D}}{mRT_{L0D}} * 1000$                                         | Efficiency ratio to detect a local target in the 0-Distractor condition. Higher value reflects higher efficiency (i.e., as reflected by higher accuracy and faster RTs) to identify the target at the local level, in the absence of any distractors.                                                                                                                               |
| Efficiency Score | L5D      | $= \frac{ACC_{L5D}}{mRT_{L5D}} * 1000$                                         | Efficiency ratio to detect a local target in the 5-Distractors condition. Higher value reflects higher efficiency (i.e., as reflected by higher accuracy and faster RTs) to identify the target at the local level, in the presence of 5 distractors.                                                                                                                               |
| Efficiency Score | G0D      | $= \frac{ACC_{G0D}}{mRT_{G0D}} * 1000$                                         | Efficiency ratio to detect a global target in the 0-Distractor condition. Higher value reflects higher efficiency (i.e., as reflected by higher accuracy and faster RTs) to identify the target at the global level, in the absence of any distractors.                                                                                                                             |

---

|                     |     |                                        |                                                                                                                                                                                                                                                         |
|---------------------|-----|----------------------------------------|---------------------------------------------------------------------------------------------------------------------------------------------------------------------------------------------------------------------------------------------------------|
| Efficiency<br>Score | G5D | $= \frac{ACC_{G5D}}{mRT_{G5D}} * 1000$ | Efficiency ratio to detect a global target in the 5-Distractors condition. Higher value reflects higher efficiency (i.e., as reflected by higher accuracy and faster RTs) to identify the target at the global level, in the presence of 5 distractors. |
|---------------------|-----|----------------------------------------|---------------------------------------------------------------------------------------------------------------------------------------------------------------------------------------------------------------------------------------------------------|

---

*Note.* Abbreviation: ACC: accuracy in %, mRT: mean reaction times for correct responses.

## 2. Accuracy Data

Younger and older groups were highly accurate and did not significantly differ in accuracy rates for any of the conditions (present-target:  $97.1\% \pm 2.4\%$  and  $97.3\% \pm 3.8\%$  (mean  $\pm$  sd),  $p=0.8$ ; absent-target:  $98.9\% \pm 1.7\%$  and  $98.2\% \pm 3.8\%$  for younger and older adults, respectively,  $p=0.2$ ).

## 3. Response times for present-target trials

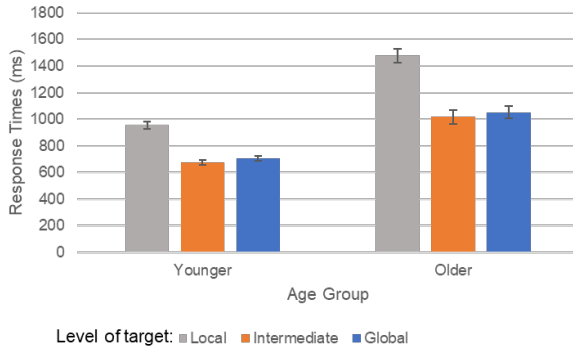

**Supplementary Figure S1: Interaction between the age group and the attentional level of the target occurrence in present-target trials. Error bars indicate standard errors of the means.**

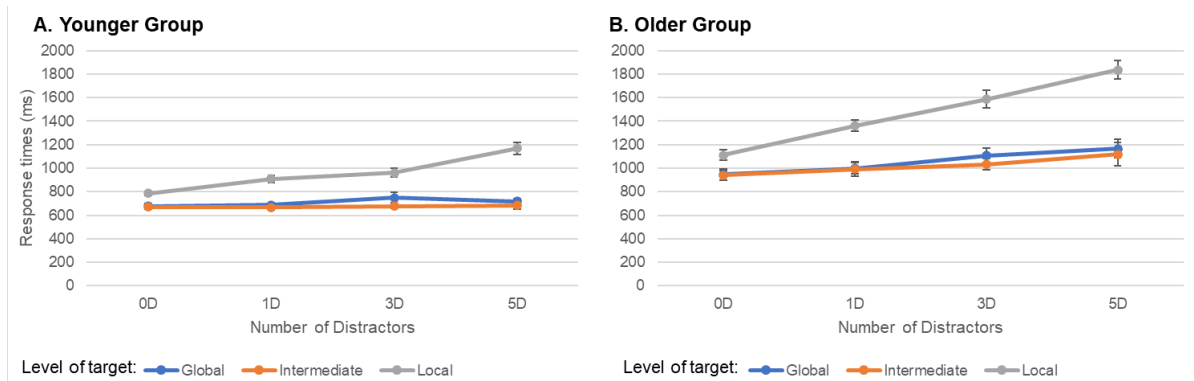

**Supplementary Figure S2: Response times by attentional level and number of distractors in present-target trials, in each age group. Error bars indicate standard errors of the mean.**

## 4. Response times for absent-target trials

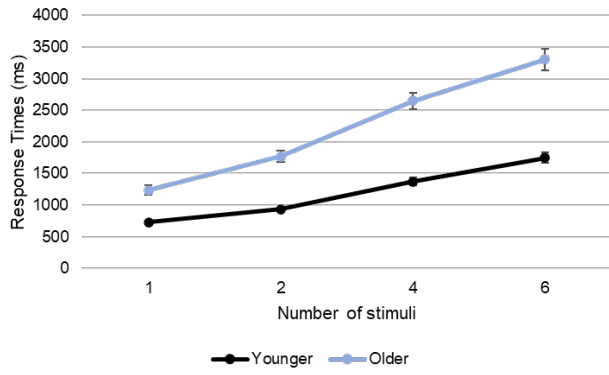

**Supplementary Figure S3: Response times by number of stimuli in absent-target trials, in each age group.** Error bars indicate standard errors of the mean.
